# Supplementary material
Source: Springer Nature journal article supplement (https://www.springermedizin.de/resource/supplementary/12889_2012_5128_MOESM2_ESM.pdf/9494742)
Supplement: MOESM2 [file 9494742]

**Percentage of Respondents**

80  
70  
60  
50  
40  
30  
20  
10  
0

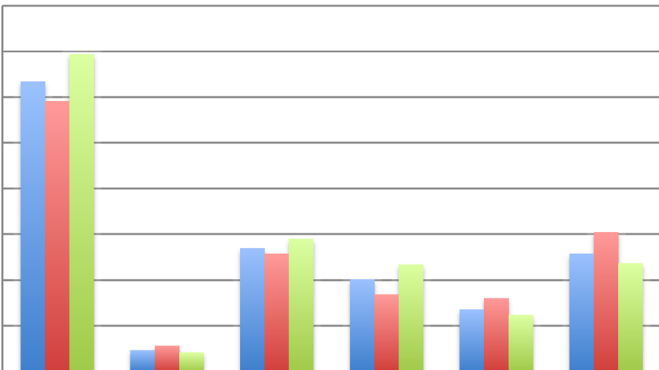

Diet

Medication

Exercise

Weight  
Loss

Tobacco  
Cessation

Unsure

Total

63.4

4.6

26.9

20.1

13.5

25.7

Men

59.1

5.6

25.7

16.8

16

30.4

Women

69.4

4.1

28.9

23.3

12.3

23.6
